# Supplementary material
Source: PubMed Central journal article supplement (PMC3959170)
Supplement: NIHMS429579-supplement-1.pdf [file NIHMS429579-supplement-1.pdf]

## SUPPLEMENTAL MATERIAL

### Detailed Methods

**Animals:** WT FVB and *Abcg2* deficient<sup>1</sup> (cat. #002767) male mice (8 weeks old) were purchased from Taconic and bred in our animal facility. All animal studies were performed according to the guidelines of the Harvard Medical School, the Longwood Medical Area's Institutional Animal Care and Use Committee (IACUC) and the National Society for Medical Research.

**CSP cell isolation and expansion:** CSP isolation was performed as previously described.<sup>2</sup> Briefly, mouse hearts were enzymatically and mechanically digested with a mixture of 0.1% collagenase B (Roche), 2.4U/ml dispase II (Roche) and 2.5mmol/L CaCl<sub>2</sub>. Mononuclear cells were stained with Hoechst 33342 (Sigma Cat #B2261) (5µg/10<sup>6</sup> cells/ml) at 37°C for 90min. Verapamil (50 mmol/L) (Sigma, #V4629) was used as a negative control. Cells were further incubated with fluorochrome-conjugated monoclonal rat anti-mouse antibodies against Sca-1, CD31 and CD45 (Pharmigen). 7-Aminoactinomycin-D (7-AAD) was used for dead cell detection. Sca1<sup>+</sup>/CD31<sup>-</sup>/CD45<sup>-</sup> CSP were used for all experiments. Sorted CSP cells were cultured in expansion medium (α-MEM, 20% FBS HI, 2 mM L-Glutamine and 1% penicillin/streptomycin). All experiments were performed with CSP cells from passages 4-6.

**Propidium iodide staining (PI):** PI staining and analysis were performed as previously described.<sup>3</sup> Briefly, CSP cells were fixed in 70% ethanol and incubated with PI staining solution (0.1% Triton-X100, 2µg/ml PI, 400ng/ml RNase A) for one hour at 37°C protected from light. Cells were analyzed by flow cytometry and data processing was performed by the ModFit Lt software (Verity House).

**Flow cytometric analysis and sorting:** Flow cytometric analysis was performed with the DXP11 analyzer (Cytek) and the Accuri C6 analyzer (BD Biosciences). FACS was performed with a FACSAria sorter (BD Biosciences). Hoechst 33342 dye was excited by an UV (355-nm) laser. Data were analyzed by the FACSDIVA software (BD Biosciences) and FlowJo (Tree Star).

**Cell Cycle Analysis Using the Fluorescence Ubiquitination Cell Cycle Indicator (FUCCI) Lentiviral System:** CSP cells were infected with lentiviruses expressing the FUCCI reporter system and selected by FACS.<sup>4</sup> Cells were synchronized in G1 (24 hours in α-MEM, 0.1% FBS HI, 2 mM L-Glutamine and 1% pen/strep) and cultured in CSP expansion medium for up to 40 hours. Sampling of the cells was performed at several time points and cells were analyzed by flow cytometry with the DXP11 analyzer (Cytek) or by confocal live imaging (Zeiss LSM 510 inverted live-cell confocal system) for Cdt1 and geminin reporters. Data were analyzed with the FlowJo and LSM510 software programs respectively. For cell cycle analysis, expression of the Cdt1 reporter in G1 phase, geminin reporter in S-G2-M cell cycle phases, expression of both protein reporters during the G1-S transition, and lack of expression of either reporter shortly after cytokinesis and in early G1 were monitored, as previously described.<sup>4</sup> T<sub>50</sub> values were calculated according to a "plateau followed by exponential decay" model.<sup>5</sup> The T<sub>50</sub> value represents the required time for G1-residing CSP cells to be decreased by 50% from their initial value.

***Abcg2* shRNA:** shRNA lentiviral constructs were generated according to the instructions provided by Addgene. Scramble (5'CCGGCCTAAGGTTAAGTCGCCCTCGCTCGAGCGAG GGCGACTTAACCTTAGGTTTTTG3') or *Abcg2* (5'CCGGGCAACACTTCTCATGACAATCC

TCGAGGATTGTCATGAGAAGTGTTGCTTTTTG3) shRNA sequences were cloned in the pLKO.1-puro lentiviral vector under the control of the U6 promoter. Infected CSP selection was achieved through selection with puromycin (4µg/ml).

**Cell cycle-focused RT-PCR gene array:** mRNA from scramble and sh-Abcg2 expressing CSP cells was used to synthesize cDNA (RT<sup>2</sup>-First strand kit, SABiosciences). Cell cycle gene expression profile was established using the Cell Cycle RT-PCR array (Cat #PAMM-020, SABiosciences) and the MyiQ cycler (Bio-Rad) according to the manufacturer's guidelines. Data were obtained from three independent experiments. Data analysis was carried out according to the manufacturer's instructions and as previously described.<sup>3</sup> The full list of the analyzed genes is provided in table 1.

**Asymmetric division assessment:** Unsynchronized CSP cells on coverslips were fixed with 4% paraformaldehyde, permeabilized with methanol followed by blocking with 1% BSA. Cells were then incubated with antibodies against phospho-Histone H3 (pH3) (1/200, Abcam Cat #ab32107) and  $\alpha$ -adaplin<sup>6</sup> (1/50, Santa Cruz cat # sc-17771) followed by secondary antibodies (1/200, anti-rabbit Alexa-488 and anti-mouse Alexa-555, Molecular probes). Coverslips were mounted on slides with DAPI-containing mounting medium (Vector Vectashield). Visualization was performed with an epi-fluorescent microscope (Zeiss, Axiovert 200M). Staining for numb<sup>6,7</sup> was performed in CSP cells fixed with 4% paraformaldehyde and permeabilized with BD Perm/Wash solution (BD biosciences) according to the manufacturer's instructions. Cells were then blocked with 1% BSA and incubated with anti-numb antibody (1/500, Abcam Cat #ab4147) followed by a secondary goat-anti-rabbit 488 antibody (Molecular probes). Data were acquired with the Accuri C6 analyzer.

**Statistical analysis:** Statistical differences were evaluated using one-way ANOVA analysis and Student's unpaired t-test, using GraphPad Prism (Version 5.03). Data are presented as mean  $\pm$  s.e.m. A p-value  $\leq$  0.05 was considered statistically significant.

**Online Table I:** Cell cycle-focused RT-PCR array of scramble and sh-Abcg2 expressing CSP cells

| Description                                                     | Symbol   | $(\Delta Ct)$ |           | Up-Down Regulation<br>(comparing to Scramble) |
|-----------------------------------------------------------------|----------|---------------|-----------|-----------------------------------------------|
|                                                                 |          | Scramble      | sh-Abcg2  |                                               |
| C-abl oncogene 1, receptor tyrosine kinase                      | Abl1     | 11.106178     | 11.420862 | -1.2437                                       |
| Adenylate kinase 1                                              | Ak1      | 1.8289        | 2.147363  | -1.247                                        |
| Amyloid beta (A4) precursor protein-binding, family B, member 1 | Apbb1    | 8.367457      | 8.377834  | -1.0072                                       |
| Ataxia telangiectasia mutated homolog (human)                   | Atm      | 5.850675      | 5.30991   | 1.4547                                        |
| Breast cancer 1                                                 | Brca1    | 7.734002      | 6.825685  | 1.8769                                        |
| Breast cancer 2                                                 | Brca2    | 6.90382       | 6.069443  | 1.7831                                        |
| Calcium/calmodulin-dependent protein kinase II alpha            | Camk2a   | 8.726875      | 8.514801  | 1.1584                                        |
| Calcium/calmodulin-dependent protein kinase II, beta            | Camk2b   | 11.106178     | 11.635309 | -1.4431                                       |
| Caspase 3                                                       | Casp3    | 4.375578      | 3.339269  | 2.051                                         |
| Cyclin A1                                                       | Ccna1    | 11.106178     | 11.635309 | -1.4431                                       |
| Cyclin A2                                                       | Ccna2    | 4.476715      | 3.571836  | 1.8724                                        |
| Cyclin B1                                                       | Ccnb1    | 3.212888      | 2.579624  | 1.5511                                        |
| Cyclin B2                                                       | Ccnb2    | 5.263591      | 3.677749  | 3.0018                                        |
| Cyclin C                                                        | Ccnc     | 6.091513      | 7.270975  | -2.2649                                       |
| Cyclin D1                                                       | Ccnd1    | 1.426526      | 2.148219  | -1.6491                                       |
| Cyclin E1                                                       | Ccne1    | 7.093276      | 7.731017  | -1.5559                                       |
| Cyclin F                                                        | Ccnf     | 4.612443      | 3.817572  | 1.7349                                        |
| Cell division cycle 25 homolog A ( <i>S. pombe</i> )            | Cdc25a   | 4.979034      | 4.111663  | 1.8243                                        |
| Cyclin-dependent kinase 2                                       | Cdk2     | 5.539315      | 5.067542  | 1.3868                                        |
| Cyclin-dependent kinase 4                                       | Cdk4     | 2.786019      | 1.978295  | 1.7504                                        |
| CDK5 regulatory subunit associated protein 1                    | Cdk5rap1 | 7.099793      | 7.425954  | -1.2537                                       |
| Cyclin-dependent kinase inhibitor 1A (P21)                      | Cdkn1a   | 1.11014       | 1.840963  | -1.6596                                       |
| Cyclin-dependent kinase inhibitor 1B                            | Cdkn1b   | 6.03447       | 4.990849  | 2.0614                                        |
| Cyclin-dependent kinase inhibitor 2A                            | Cdkn2a   | 2.639825      | 3.229998  | -1.5054                                       |
| Checkpoint kinase 1 homolog ( <i>S. pombe</i> )                 | Chek1    | 6.8862        | 6.34775   | 1.4524                                        |
| CDC28 protein kinase 1b                                         | Cks1b    | 3.106571      | 2.649848  | 1.3724                                        |
| DNA-damage inducible transcript 3                               | Ddit3    | 2.194981      | 3.402252  | -2.309                                        |
| DnaJ (Hsp40) homolog, subfamily C, member 2                     | Dnajc2   | 3.320207      | 3.546802  | -1.1701                                       |
| Dystonin                                                        | Dst      | 4.176003      | 4.096243  | 1.0568                                        |
| E2F transcription factor 1                                      | E2f1     | 7.65494       | 6.996614  | 1.5783                                        |
| E2F transcription factor 2                                      | E2f2     | 11.106178     | 11.635309 | -1.4431                                       |
| E2F transcription factor 3                                      | E2f3     | 6.080322      | 6.247647  | -1.123                                        |
| E2F transcription factor 4                                      | E2f4     | 3.772541      | 3.754677  | 1.0125                                        |
| Growth arrest and DNA-damage-inducible 45 alpha                 | Gadd45a  | 4.521487      | 5.196044  | -1.5961                                       |
| G protein-coupled receptor 132                                  | Gpr132   | 11.106178     | 11.635309 | -1.4431                                       |
| Hus1 homolog ( <i>S. pombe</i> )                                | Hus1     | 6.020265      | 6.168142  | -1.1079                                       |
| Inhibin alpha                                                   | Inha     | 7.611555      | 7.451969  | 1.117                                         |

|                                                                           |         |           |           |         |
|---------------------------------------------------------------------------|---------|-----------|-----------|---------|
| Integrin beta 1 (fibronectin receptor beta)                               | Itgb1   | -1.705923 | -1.351013 | -1.2789 |
| Microtubule-actin crosslinking factor 1                                   | Macf1   | 2.085609  | 2.332797  | -1.1869 |
| MAD2 mitotic arrest deficient-like 1 (yeast)                              | Mad2l1  | 4.865167  | 4.094512  | 1.706   |
| Minichromosome maintenance deficient 2 mitotin (S. cerevisiae)            | Mcm2    | 5.947158  | 4.838795  | 2.156   |
| Minichromosome maintenance deficient 3 (S. cerevisiae)                    | Mcm3    | 4.530528  | 3.72946   | 1.7424  |
| Minichromosome maintenance deficient 4 homolog (S. cerevisiae)            | Mcm4    | 2.64628   | 2.084709  | 1.4759  |
| Transformed mouse 3T3 cell double minute 2                                | Mdm2    | 2.738524  | 1.620668  | 2.1702  |
| Antigen identified by monoclonal antibody Ki 67                           | Mki67   | 3.514161  | 2.721685  | 1.732   |
| Meiotic recombination 11 homolog A (S. cerevisiae)                        | Mre11a  | 6.648424  | 5.72085   | 1.9021  |
| MutS homolog 2 (E. coli)                                                  | Msh2    | 4.539862  | 3.850688  | 1.6124  |
| Mdm2, transformed 3T3 cell double minute p53 binding protein              | Mtbp    | 8.635183  | 8.600524  | 1.0243  |
| Myeloblastosis oncogene                                                   | Myb     | 11.106178 | 11.635309 | -1.4431 |
| NIMA (never in mitosis gene a)-related expressed kinase 2                 | Nek2    | 11.106178 | 10.252296 | 1.8074  |
| Nuclear factor of activated T-cells, cytoplasmic, calcineurin-dependent 1 | Nfatc1  | 3.728189  | 3.840408  | -1.0809 |
| Notch gene homolog 2 (Drosophila)                                         | Notch2  | 8.373932  | 6.396327  | 3.9384  |
| Nucleophosmin/nucleoplasmin 2                                             | Npm2    | 11.106178 | 11.350593 | -1.1846 |
| Proliferating cell nuclear antigen                                        | Pcna    | 2.143046  | 1.263756  | 1.8395  |
| Pescadillo homolog 1, containing BRCT domain (zebrafish)                  | Pes1    | 4.101918  | 4.226599  | -1.0903 |
| Polycystic kidney disease 1 homolog                                       | Pkd1    | 4.02754   | 4.328398  | -1.2319 |
| Peripheral myelin protein 22                                              | Pmp22   | 2.233625  | 2.111629  | 1.0882  |
| Protein phosphatase 1D magnesium-dependent, delta isoform                 | Ppm1d   | 5.607756  | 5.029499  | 1.493   |
| Protein phosphatase 2 (formerly 2A), regulatory subunit B", alpha         | Ppp2r3a | 10.805114 | 9.865458  | 1.9181  |
| Protein phosphatase 3, catalytic subunit, alpha isoform                   | Ppp3ca  | 3.788133  | 4.481805  | -1.6174 |
| Protamine 1                                                               | Prm1    | 11.106178 | 11.635309 | -1.4431 |
| RAD17 homolog (S. pombe)                                                  | Rad17   | 6.058783  | 6.062272  | -1.0024 |
| RAD21 homolog (S. pombe)                                                  | Rad21   | 4.681669  | 4.442202  | 1.1806  |
| RAD51 homolog (S. cerevisiae)                                             | Rad51   | 9.395378  | 8.334477  | 2.0862  |
| RAD9 homolog (S. pombe)                                                   | Rad9    | 5.869122  | 5.696741  | 1.1269  |
| RAN, member RAS oncogene family                                           | Ran     | -1.819387 | -1.503806 | -1.2445 |
| Retinoblastoma-like 1 (p107)                                              | Rbl1    | 7.246548  | 6.439949  | 1.7491  |
| Retinoblastoma-like 2                                                     | Rbl2    | 6.16683   | 5.920503  | 1.1862  |
| Sestrin 2                                                                 | Sesn2   | 6.770173  | 7.372871  | -1.5186 |
| Stratifin                                                                 | Sfn     | 10.925972 | 11.333543 | -1.3265 |
| Src homology 2 domain-containing transforming protein C1                  | Shc1    | 3.27843   | 3.011812  | 1.203   |
| S-phase kinase-associated protein 2 (p45)                                 | Skp2    | 6.762598  | 7.075956  | -1.2426 |
| Schlafen 1                                                                | Slnf1   | 11.106178 | 11.635309 | -1.4431 |

|                                                                           |        |           |           |         |
|---------------------------------------------------------------------------|--------|-----------|-----------|---------|
| Structural maintenance of chromosomes 1A                                  | Smc1a  | 4.750962  | 3.845469  | 1.8732  |
| Stromal antigen 1                                                         | Stag1  | 5.081462  | 4.207143  | 1.8331  |
| SMT3 suppressor of mif two 3 homolog 1 (yeast)                            | Sumo1  | 2.225602  | 2.041863  | 1.1358  |
| TAF10 RNA polymerase II, TATA box binding protein (TBP)-associated factor | Taf10  | 2.538463  | 3.137654  | -1.5149 |
| Telomeric repeat binding factor 1                                         | Terf1  | 6.846584  | 5.840404  | 2.0086  |
| Transcription factor Dp 1                                                 | Tfdp1  | 1.425901  | 1.350236  | 1.0538  |
| Proteasome (prosome, macropain) assembly chaperone 2                      | Psmg2  | 6.058063  | 5.13353   | 1.8981  |
| Transformation related protein 53                                         | Trp53  | 3.339588  | 2.5548    | 1.7228  |
| Transformation related protein 63                                         | Trp63  | 11.106178 | 11.635309 | -1.4431 |
| Tumor susceptibility gene 101                                             | Tsg101 | 5.633285  | 6.251244  | -1.5347 |
| WEE 1 homolog 1 (S. pombe)                                                | Wee1   | 5.28807   | 5.570576  | -1.2163 |

## Supplemental References

1. Zhou S, Morris J, Barnes Y, Lan L, Schuetz J, Sorrentino B. Bcrp1 gene expression is required for normal numbers of side population stem cells in mice, and confers relative protection to mitoxantrone in hematopoietic cells in vivo. *Proceedings of the National Academy of Sciences of the United States of America*. 2002;99:12339-12383.
2. Pfister O, Oikonomopoulos A, Sereti K-I, Liao R. Isolation of resident cardiac progenitor cells by hoechst 33342 staining. *Methods in molecular biology (Clifton, N.J.)*. 2010;660:53-116.
3. Oikonomopoulos A, Sereti KI, Conyers F, Bauer M, Liao A, Guan J, Crapps D, Han JK, Dong H, Bayomy AF, Fine GC, Westerman K, Biechele TL, Moon RT, Force T, Liao R. Wnt signaling exerts an antiproliferative effect on adult cardiac progenitor cells through igfbp3. *Circ Res*. 2011;109:1363-1374.
4. Sakaue-Sawano A, Kurokawa H, Morimura T, Hanyu A, Hama H, Osawa H, Kashiwagi S, Fukami K, Miyata T, Miyoshi H, Imamura T, Ogawa M, Masai H, Miyawaki A. Visualizing spatiotemporal dynamics of multicellular cell-cycle progression. *Cell*. 2008;132:487-585.
5. Schauble S, Klement K, Marthandan S, Munch S, Heiland I, Schuster S, Hemmerich P, Diekmann S. Quantitative model of cell cycle arrest and cellular senescence in primary human fibroblasts. *PLoS One*. 2012;7:e42150.
6. Cottage C, Bailey B, Fischer K, Avitable D, Collins B, Tuck S, Quijada P, Gude N, Alvarez R, Muraski J, Sussman M. Cardiac progenitor cell cycling stimulated by pim-1 kinase. *Circulation research*. 2010;106:891-1792.
7. Gulino A, Di Marcotullio L, Screpanti I. The multiple functions of numb. *Exp Cell Res*. 2010;316:900-906.

**Online Video I:** Representative video of time-lapse live imaging (40X) monitoring of Fucci<sup>+</sup> WT CSP cells 18-40 hours following synchronization.

**Online Video II:** Representative video of time-lapse live imaging (40X) monitoring of Fucci<sup>+</sup> Abcg2-KO CSP cells 18-40 hours following synchronization.
